# Supplementary material for: Aerobic oxidation of primary benzylic amines to amides and nitriles catalyzed by ruthenium carbonyl clusters carrying N,O-bidentate ligands
Source: Royal Society of Chemistry journal article supplement (doi:10.1039/d0dt00045k), 2020-01-01
Supplement: d0dt00045k1.pdf [file d0dt00045k1.pdf]

## Supporting information

### **Aerobic oxidation of primary benzylic amines to amides and nitriles catalyzed by ruthenium carbonyl clusters carrying *N,O*-bidentate ligands**

Xinlong Yan,<sup>a‡</sup> Qing Dong,<sup>a‡</sup> Ying Li,<sup>a</sup> Lizhen Meng,<sup>a</sup> Zhiqiang Hao,<sup>\*a</sup> Zhangang Han,<sup>a</sup> Guo-Liang Lu<sup>b</sup> and Jin Lin<sup>\*a</sup>

<sup>a</sup> Hebei Key Laboratory of Organic Functional Molecules, The College of Chemistry and Material Science, Hebei Normal University, Shijiazhuang 050024, People's Republic of China

<sup>b</sup> Auckland Cancer Society Research Centre, Faculty of Medical and Health Sciences, The University of Auckland, Private Bag 92019, Auckland 1142, New Zealand

‡ Both authors contributed equally to this work.

Correspondence to: Zhiqiang Hao and Jin Lin, College of Chemistry and Material Science, Hebei Normal University, Shijiazhuang 050024, China

E-mail: [haozhiqiang1001@163.com](mailto:haozhiqiang1001@163.com); [linjin64@126.com](mailto:linjin64@126.com)

### **Table of Contents**

|                                                               |    |
|---------------------------------------------------------------|----|
| 1. The screening of bases and solvents.....                   | S1 |
| 2. Crystal data for <b>1b</b> , <b>2a</b> and <b>2b</b> ..... | S2 |
| 3. NMR data of the primary amides.....                        | S4 |
| 4. NMR data of the benzonitrile derivatives.....              | S7 |

## 1. The screening of bases and solvents

**Table S1.** Screening of bases and solvents for oxygenation of benzylamine to benzamide catalyzed by **1b**<sup>a</sup>

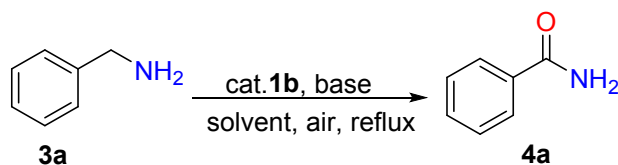

| Run | Solvent                            | Base                            | Conversion <sup>b</sup><br>(%) | Yield <sup>b</sup><br>(%) |
|-----|------------------------------------|---------------------------------|--------------------------------|---------------------------|
| 1   | <i>i</i> -PrOH                     | <i>t</i> -BuOK                  | 76                             | 60                        |
| 2   | CH <sub>3</sub> CH <sub>2</sub> OH | <i>t</i> -BuOK                  | 79                             | 18                        |
| 3   | CH <sub>3</sub> OH                 | <i>t</i> -BuOK                  | 72                             | 12                        |
| 4   | THF                                | <i>t</i> -BuOK                  | 42                             | 11                        |
| 5   | Toluene                            | <i>t</i> -BuOK                  | trace                          | trace                     |
| 6   | 1,4-dioxane                        | <i>t</i> -BuOK                  | 56                             | 32                        |
| 7   | <i>t</i> -BuOH                     | <i>t</i> -BuOK                  | 90                             | 77                        |
| 8   | <i>t</i> -BuOH                     | KOH                             | 86                             | 70                        |
| 9   | <i>t</i> -BuOH                     | NaOH                            | 68                             | 43                        |
| 10  | <i>t</i> -BuOH                     | Na <sub>2</sub> CO <sub>3</sub> | 60                             | 22                        |
| 11  | <i>t</i> -BuOH                     | NaHCO <sub>3</sub>              | 48                             | 17                        |
| 12  | <i>t</i> -BuOH                     | DABCO                           | 35                             | trace                     |
| 13  | <i>t</i> -BuOH                     | CS <sub>2</sub> CO <sub>3</sub> | 28                             | trace                     |

<sup>a</sup> Reaction conditions: benzyl amine (1.0 mmol), Cat. **1b** (3.0 mol%), *t*-BuOK (1.0 mmol), *t*-BuOH (4.0 mL), *t* = 12 h. <sup>b</sup> determined by GC.

## 2. Crystal data for 1b, 2a and 2b.

**Table S2.** Crystal data and structure refinements of ruthenium complexes

| Complex                                       | 1b                                                                                             | 2a                                                                             | 2b                                                                                             |
|-----------------------------------------------|------------------------------------------------------------------------------------------------|--------------------------------------------------------------------------------|------------------------------------------------------------------------------------------------|
| formula                                       | C <sub>32</sub> H <sub>16</sub> Br <sub>4</sub> N <sub>2</sub> O <sub>10</sub> Ru <sub>3</sub> | C <sub>36</sub> H <sub>24</sub> N <sub>2</sub> O <sub>12</sub> Ru <sub>3</sub> | C <sub>34</sub> H <sub>18</sub> Br <sub>2</sub> N <sub>2</sub> O <sub>10</sub> Ru <sub>3</sub> |
| <i>F</i> <sub>w</sub>                         | 1211.32                                                                                        | 979.78                                                                         | 1077.52                                                                                        |
| <i>T</i> , K                                  | 298(2)                                                                                         | 298(2) K                                                                       | 296(2) K                                                                                       |
| Wavelength (Å)                                | 0.71073                                                                                        | 0.71073                                                                        | 0.71073                                                                                        |
| Crystal system                                | Monoclinic                                                                                     | Triclinic                                                                      | Triclinic                                                                                      |
| space group                                   | <i>C</i> 2/ <i>c</i>                                                                           | <i>P</i> -1                                                                    | <i>P</i> -1                                                                                    |
| <i>a</i> (Å)                                  | 11.6950(9)                                                                                     | 11.4233(11)                                                                    | 9.9227(5)                                                                                      |
| <i>b</i> (Å)                                  | 16.5574(16)                                                                                    | 12.1695(12)                                                                    | 12.4570(6)                                                                                     |
| <i>c</i> (Å)                                  | 19.8654(18)                                                                                    | 15.1533(14)                                                                    | 16.0614(8)                                                                                     |
| <i>α</i> (°)                                  | 90                                                                                             | 70.4830(10)                                                                    | 80.5840(10)                                                                                    |
| <i>β</i> (°)                                  | 103.851(3)                                                                                     | 87.865(2)                                                                      | 74.3200(10)                                                                                    |
| <i>γ</i> (°)                                  | 90                                                                                             | 78.5920(10)                                                                    | 67.5180(10)                                                                                    |
| Volume (Å <sup>3</sup> )                      | 3720.7(5)                                                                                      | 1945.3(3)                                                                      | 1762.10(15)                                                                                    |
| <i>Z</i>                                      | 4                                                                                              | 2                                                                              | 2                                                                                              |
| <i>D</i> <sub>calc</sub> (mg/m <sup>3</sup> ) | 2.162                                                                                          | 1.673                                                                          | 2.031                                                                                          |
| <i>μ</i> (mm <sup>-1</sup> )                  | 5.554                                                                                          | 1.211                                                                          | 3.596                                                                                          |
| <i>F</i> (000)                                | 2296                                                                                           | 964                                                                            | 1036                                                                                           |
| Crystal size (mm)                             | 0.27×0.23×0.12                                                                                 | 0.43 x 0.32 x 0.30                                                             | 0.28 x 0.26 x 0.19 mm                                                                          |
| <i>θ</i> range (°)                            | 2.47-25.02                                                                                     | 2.28-25.02                                                                     | 2.281-28.315                                                                                   |
| Reflections collected                         | 9115/3259                                                                                      | 9720/6722                                                                      | 2.281 to 28.315                                                                                |
| <i>R</i> (int)                                | 0.0437                                                                                         | 0.0414                                                                         | 0.0329                                                                                         |
| Completeness to <i>θ</i>                      | 99.70%                                                                                         | 97.9%                                                                          | 98.7 %                                                                                         |
| Max. and min. transmission                    | 0.5554/0.3155                                                                                  | 0.7127/0.6240                                                                  | 0.5636/ 0.3812                                                                                 |
| Data/restraints/ parameters                   | 3259/0/231                                                                                     | 6722 / 0 / 480                                                                 | 8654 / 0 / 461                                                                                 |
| Goodness-of-fit on <i>F</i> <sup>2</sup>      | 1.044                                                                                          | 1.046                                                                          | 1.023                                                                                          |

---

|                                |                |                |                |
|--------------------------------|----------------|----------------|----------------|
| $R_1, wR_2 [I > 2\sigma(I)]$   | 0.0354, 0.0731 | 0.0400, 0.1000 | 0.0381, 0.1040 |
| $R_1, wR_2$ (all data)         | 0.0592, 0.0797 | 0.0531, 0.1100 | 0.0473, 0.1211 |
| Max.peak/(e.Å <sup>-3</sup> )  | 0.856          | 0.924          | 2.251          |
| Mini.peak/(e.Å <sup>-3</sup> ) | -0.783         | -1.033         | -1.380         |
| CCDC                           | 1559100        | 1558722        | 1504156        |

---

### 3. NMR data of the primary amides

#### 1. benzamide (**4a**)

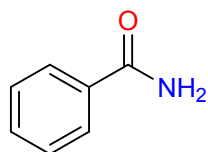

$^1\text{H}$  NMR (DMSO- $d_6$ , 400 MHz, 298 K):  $\delta$  7.99 (s, 1H,  $\text{NH}_2$ ), 7.89 (d,  $J = 7.0$  Hz, 2H, Ph- $H$ ), 7.51 (t,  $J = 7.3$  Hz, 1H, Ph- $H$ ), 7.45 (t,  $J = 7.3$  Hz, 2H, Ph- $H$ ), 7.38 (s, 1H,  $\text{NH}_2$ ) ppm.  $^{13}\text{C}$  NMR (100 MHz, DMSO- $d_6$ , 298 K):  $\delta$  167.9, 134.3, 131.2, 128.2, 127.5 ppm.

#### 2. 4-methylbenzamide (**4b**)

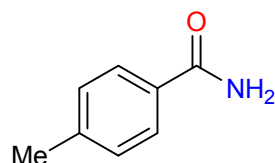

$^1\text{H}$  NMR (DMSO- $d_6$ , 400 MHz, 298 K):  $\delta$  7.87 (s, 1H,  $\text{NH}_2$ ), 7.77 (d,  $J = 8.1$  Hz, 2H,  $\text{C}_6\text{H}_4$ ), 7.23-7.25 (m, 3H,  $\text{C}_6\text{H}_4$ ,  $\text{NH}_2$ ), 2.34 (s, 3H,  $\text{CH}_3$ ) ppm.  $^{13}\text{C}$  NMR (100 MHz, DMSO- $d_6$ , 298 K):  $\delta$  167.7, 141.1, 131.5, 128.7, 127.5, 20.9 ppm.

#### 3. 3-methylbenzamide (**4c**)

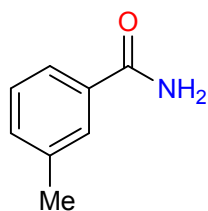

$^1\text{H}$  NMR (DMSO- $d_6$ , 400 MHz, 298 K):  $\delta$  7.93 (s, 1H,  $\text{NH}_2$ ), 7.67-7.71 (m, 2H,  $\text{C}_6\text{H}_4$ ), 7.31-7.34 (m, 3H,  $\text{C}_6\text{H}_4$ ,  $\text{NH}_2$ ), 2.34 (s, 3H,  $\text{CH}_3$ ) ppm.  $^{13}\text{C}$  NMR (DMSO- $d_6$ , 100 MHz, 298 K):  $\delta$  168.1, 137.4, 134.3, 131.8, 128.1, 124.6, 20.9 ppm.

#### 4. 2-methylbenzamide (**4d**)

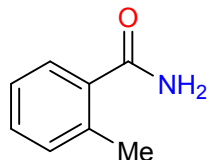

$^1\text{H}$  NMR (DMSO- $d_6$ , 400 MHz, 298 K):  $\delta$  7.68 (s, 1H,  $\text{NH}_2$ ), 7.28-7.36 (m, 3H,  $\text{C}_6\text{H}_4$ ,  $\text{NH}_2$ ), 7.18-7.23 (m, 2H,  $\text{C}_6\text{H}_4$ ), 2.36 (s, 2H,  $\text{CH}_3$ ) ppm.  $^{13}\text{C}$  NMR (DMSO- $d_6$ , 100 MHz, 298 K):  $\delta$  171.1, 137.0, 135.2, 130.5, 129.1, 127.0, 125.3, 19.7 ppm.

#### 5. 4-methoxybenzamide (**4e**)

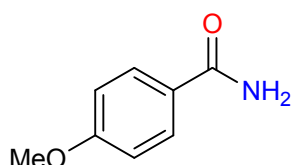

$^1\text{H}$  NMR (DMSO- $d_6$ , 400 MHz, 298 K):  $\delta$  7.85 (m, 3H,  $\text{C}_6\text{H}_4$ ,  $\text{NH}_2$ ), 7.17 (s, 1H,  $\text{NH}_2$ ), 6.97 (d,  $J = 8.9$  Hz, 2H,  $\text{C}_6\text{H}_4$ ), 3.80 (s, 3H,  $\text{OCH}_3$ ) ppm.  $^{13}\text{C}$  NMR (DMSO- $d_6$ , 100 MHz, 298 K):  $\delta$  167.4, 161.6, 129.3, 126.5, 113.4, 55.3 ppm.

6. 4-(tert-butyl)benzamide (**4f**)

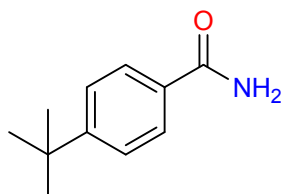

$^1\text{H}$  NMR (DMSO- $d_6$ , 400 MHz, 298 K):  $\delta$  7.88 (s, 1H,  $\text{NH}_2$ ), 7.80 (d,  $J = 8.5$  Hz, 2H,  $\text{C}_6\text{H}_4$ ), 7.45 (d,  $J = 8.5$  Hz, 2H,  $\text{C}_6\text{H}_4$ ), 7.25 (s, 1H,  $\text{NH}_2$ ), 1.29 (s, 9H,  $\text{CH}_3$ ) ppm.  $^{13}\text{C}$  NMR (DMSO- $d_6$ , 100 MHz, 298 K):  $\delta$  167.8, 153.9, 131.5, 127.3, 124.9, 34.6, 30.9 ppm.

7. 4-chlorobenzamide (**4g**)

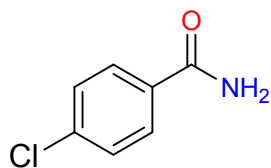

$^1\text{H}$  NMR (DMSO- $d_6$ , 400 MHz, 298 K):  $\delta$  8.04 (s, 1H,  $\text{NH}_2$ ), 7.89 (d,  $J = 8.5$  Hz, 1H,  $\text{C}_6\text{H}_4$ ), 7.52 (d,  $J = 8.5$  Hz, 1H,  $\text{C}_6\text{H}_4$ ), 7.45 (s, 1H,  $\text{NH}_2$ ) ppm.  $^{13}\text{C}$  NMR (DMSO- $d_6$ , 100 MHz, 298 K):  $\delta$  166.8, 136.1, 133.0, 129.4, 128.3 ppm.

8. 4-(trifluoromethyl)benzamide (**4h**)

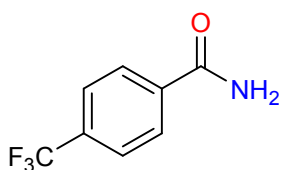

$^1\text{H}$  NMR (DMSO- $d_6$ , 400 MHz, 298 K):  $\delta$  8.19 (s, 1H,  $\text{NH}_2$ ), 8.06 (d,  $J = 8.0$  Hz, 2H,  $\text{C}_6\text{H}_4$ ), 7.84 (d,  $J = 8.2$  Hz, 2H,  $\text{C}_6\text{H}_4$ ), 7.61 (s, 1H,  $\text{NH}_2$ ) ppm.  $^{13}\text{C}$  NMR (DMSO- $d_6$ , 100 MHz, 298 K):  $\delta$  166.7, 138.1, 131.3 (q,  $J_{\text{C-F}} = 31.7$  Hz), 128.3, 125.3. (q,  $J_{\text{C-F}} = 5.1$  Hz), 122.6 (q,  $J_{\text{C-F}} = 270.7$  Hz) ppm.

9. 4-fluorobenzamide (**4i**)

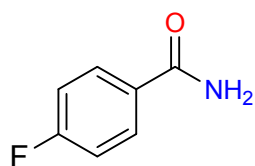

$^1\text{H}$  NMR (DMSO- $d_6$ , 400 MHz, 298 K):  $\delta$  7.99 (s, 1H,  $\text{NH}_2$ ), 7.92-7.96 (m, 2H,  $\text{C}_6\text{H}_4$ ), 7.39 (s, 1H,  $\text{NH}_2$ ), 7.24-7.29 (m, 2H,  $\text{C}_6\text{H}_4$ ) ppm.  $^{13}\text{C}$  NMR (DMSO- $d_6$ , 100 MHz, 298 K):  $\delta$  166.8, 165.2, 130.8, 130.1, 115.2 ppm.

10. 3-fluorobenzamide (**4j**)

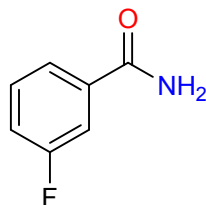

$^1\text{H}$  NMR (DMSO- $d_6$ , 400 MHz, 298 K):  $\delta$  8.05 (s, 1H,  $\text{NH}_2$ ), 7.72 (d,  $J = 7.7$  Hz, 1H,  $\text{C}_6\text{H}_4$ ), 7.67 (d,  $J = 9.2$  Hz, 1H,  $\text{C}_6\text{H}_4$ ), 7.48-7.53 (m, 2H,  $\text{C}_6\text{H}_4$ ,  $\text{NH}_2$ ), 7.37 (t,  $J = 8.3$  Hz, 1H,  $\text{C}_6\text{H}_4$ ) ppm.  $^{13}\text{C}$  NMR (DMSO- $d_6$ , 100 MHz, 298 K):  $\delta$  166.5, 163.2, 136.8, 130.3, 123.6, 118.0, 114.1 ppm.

11. 2-fluorobenzamide (**4k**)

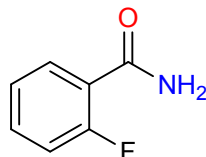

$^1\text{H}$  NMR (DMSO- $d_6$ , 400 MHz, 298 K):  $\delta$  7.61-7.69 (m, 3H,  $\text{C}_6\text{H}_4$ ,  $\text{NH}_2$ ), 7.49-7.55 (m, 1H,  $\text{C}_6\text{H}_4$ ), 7.24-7.29 (m, 2H,  $\text{C}_6\text{H}_4$ ) ppm.  $^{13}\text{C}$  NMR (DMSO- $d_6$ , 100 MHz, 298 K):  $\delta$  165.2, 160.5, 132.4, 130.2, 124.4, 123.8, 116.2 ppm.

12. furan-2-carboxamide (**4l**)

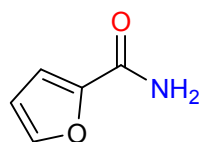

$^1\text{H}$  NMR (DMSO- $d_6$ , 400 MHz, 298 K):  $\delta$  7.79 (s, 1H, furan- $\text{CH}$ ), 7.74 (s, 1H,  $\text{NH}_2$ ), 7.35 (s, 1H,  $\text{NH}_2$ ), 7.08 (d,  $J = 3.4$  Hz, 1H, furan- $\text{CH}$ ), 6.59 (d,  $J = 3.3$  Hz, 1H, furan- $\text{CH}$ ) ppm.  $^{13}\text{C}$  NMR (DMSO- $d_6$ , 100 MHz, 298 K):  $\delta$  159.4, 147.9, 145.0, 113.6, 111.8 ppm.

13. pyridin-2-ylmethanamine (**4m**)

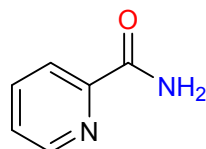

$^1\text{H}$  NMR (DMSO- $d_6$ , 400 MHz, 298 K):  $\delta$  8.62 (d,  $J = 4.3$  Hz, 1H, Py- $\text{H}$ ), 8.14 (s, 1H,  $\text{NH}_2$ ), 8.02 (d,  $J = 8.9$  Hz, 1H, Py- $\text{H}$ ), 7.98 (t,  $J = 7.7$ , 1H, Py- $\text{H}$ ), 7.65 (s, 1H,  $\text{NH}_2$ ), 7.58 (t,  $J = 7.4$  Hz, 1H, Py- $\text{H}$ ) ppm.  $^{13}\text{C}$  NMR (DMSO- $d_6$ , 100 MHz, 298 K):  $\delta$  165.7, 150.0, 148.2, 137.4, 126.2, 121.6 ppm.

## 4. NMR data of the benzonitrile derivatives

### 1. benzonitrile (**5a**)

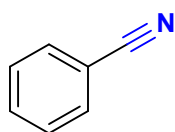

$^1\text{H}$  NMR (400 MHz,  $\text{CDCl}_3$ , 298 K):  $\delta$  7.59-7.70 (m, 3H), 7.52-7.46 (m, 2H) ppm.  $^{13}\text{C}$  NMR (100 MHz,  $\text{CDCl}_3$ , 298 K):  $\delta$  132.4, 131.6, 129.1, 118.8, 112.3 ppm.

### 2. 4-Methylbenzonitrile (**5b**)

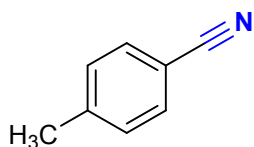

$^1\text{H}$  NMR (400 MHz,  $\text{CDCl}_3$ , 298 K):  $\delta$  7.81 (d,  $J = 7.0$  Hz, 2H), 7.49 (d,  $J = 7.6$  Hz, 2H), 2.05 (s, 3H) ppm.  $^{13}\text{C}$  NMR (100 MHz,  $\text{CDCl}_3$ , 298 K):  $\delta$  143.7, 132.0, 129.8, 119.2, 109.2, 21.8 ppm.

### 3. 4-Methoxybenzonitrile (**5d**)

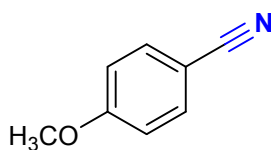

$^1\text{H}$  NMR (400 MHz,  $\text{CDCl}_3$ , 298 K):  $\delta$  7.59 (d,  $J = 8.6$  Hz, 2H), 6.95 (d,  $J = 8.6$  Hz, 2H), 3.86 (s, 3H) ppm.  $^{13}\text{C}$  NMR (100 MHz,  $\text{CDCl}_3$ , 298 K):  $\delta$  163.0, 134.1, 119.3, 114.8, 104.0, 55.6 ppm.

### 4. 4-*tert*-Butylbenzonitrile (**5e**)

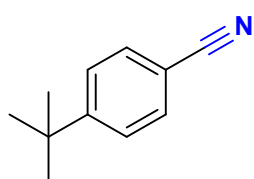

$^1\text{H}$  NMR (400 MHz,  $\text{CDCl}_3$ , 298 K):  $\delta$  7.59 (d,  $J = 7.0$  Hz, 2H), 7.48 (d,  $J = 7.1$  Hz, 2H), 1.33 (s, 9H) ppm.  $^{13}\text{C}$  NMR (100 MHz,  $\text{CDCl}_3$ , 298 K):  $\delta$  156.8, 131.9, 126.1, 119.1, 109.1, 35.2, 30.9 ppm.

### 5. 4-Chlorobenzonitrile (**5f**)

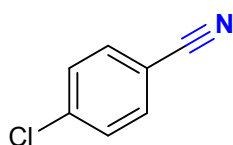



$^1\text{H}$  NMR (400 MHz,  $\text{CDCl}_3$ , 298 K):  $\delta$  7.61 (d,  $J = 8.6$  Hz, 2H), 7.49 (d,  $J = 2.2$  Hz, 2H) ppm.  $^{13}\text{C}$  NMR (100 MHz,  $\text{CDCl}_3$ , 298 K):  $\delta$  144.4, 131.0, 129.0, 115.7, 109.2 ppm.

6. 4-Fluorobenzonitrile (**5g**)

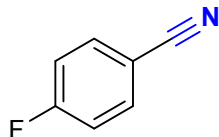

$^1\text{H}$  NMR (400 MHz,  $\text{CDCl}_3$ , 298 K):  $\delta$  7.74-7.68 (m, 2H), 7.55-7.51 (m, 2H) ppm.  $^{13}\text{C}$  NMR (100 MHz,  $\text{CDCl}_3$ , 298 K):  $\delta$  166.4, 132.3, 118.9, 116.4, 108.2 ppm.

7. 2-Furonitrile (**5i**)

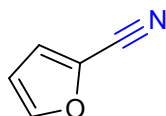

$^1\text{H}$  NMR (400 MHz,  $\text{CDCl}_3$ , 298 K):  $\delta$  7.57 (s, 1H), 6.80 (s, 1H), 6.55 (s, 1H) ppm.  $^{13}\text{C}$  NMR (100 MHz,  $\text{CDCl}_3$ , 298 K):  $\delta$  149.5, 143.4, 137.1, 112.2, 110.2 ppm.

8. 2-Pyridinecarbonitrile (**5j**)

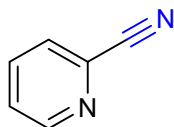

$^1\text{H}$  NMR (400 MHz,  $\text{CDCl}_3$ , 298 K):  $\delta$  8.65 (s, 1H), 7.81 (s, 1H), 7.71 (s, 1H), 7.54 (s, 1H) ppm.  $^{13}\text{C}$  NMR (100 MHz,  $\text{CDCl}_3$ , 298 K):  $\delta$  151.1, 137.1, 134.0, 128.6, 127.0, 117.2 ppm.
